# Supplementary material for: Improving the anti-icing/frosting property of a nanostructured superhydrophobic surface by the optimum selection of a surface modifier
Source: Royal Society of Chemistry journal article supplement (doi:10.1039/c8ra00712h), 2018-01-01
Supplement: c8ra00712h2.pdf [file c8ra00712h2.pdf]

## Supplementary information

### Improving the Anti-icing/frosting Property of Nanostructured Superhydrophobic Surface by Optimum Selection of Surface Modifier

Zhiping Zuo<sup>1,2\*</sup>, Ruijin Liao<sup>2</sup>, Xiaoyu Song<sup>3</sup>, Xuotong Zhao<sup>2</sup>, Yuan Yuan<sup>4</sup>

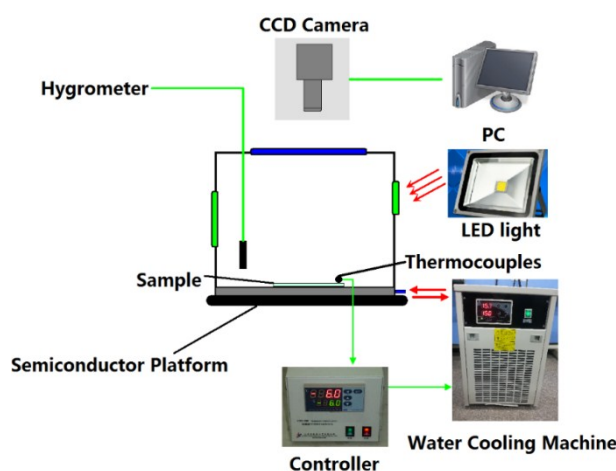

Fig. S1 The layout of the Peltier-based platform.

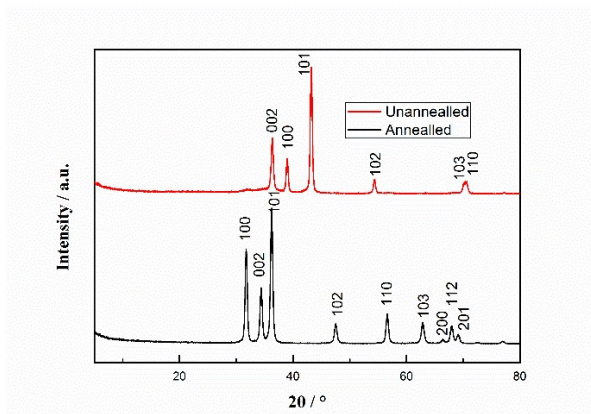

Fig. S2 XRD patterns of the as-prepared substrates before and after annealing treatment. It could be found that the peaks centered at  $2\theta = 36.38^\circ, 38.96^\circ, 43.22^\circ, 54.42^\circ, 70.24^\circ,$  and  $70.64^\circ$  were assigned to (002), (100), (101), (102), (103) and (110) planes of Zn [1]. However, different peaks were found after annealing treatment in the muffle furnace. The peaks centered at  $2\theta = 31.70^\circ, 34.36^\circ, 36.24^\circ, 47.6^\circ, 56.58^\circ, 62.86^\circ, 66.42^\circ, 67.98^\circ$  and  $69.10^\circ$  were assigned to (100), (002), (101), (102), (110), (103), (200), (112) and (201) planes of hexagonal ZnO [2, 3].

| PDMS     | G502     | HDTMS     | FAS-17    | ZnO     |
|----------|----------|-----------|-----------|---------|
|          |          |           |           |         |
| CA=93.7° | CA=94.3° | CA=101.7° | CA=108.9° | CA=8.6° |
|          |          |           |           |         |
| SA>90°   | SA>90°   | SA=66.8°  | SA=17.6°  | SA>90°  |

Fig. S3 CA and SA of bare glass modified with PDMS, G502, HDTMS and FAS17 and ZnO surface without modification

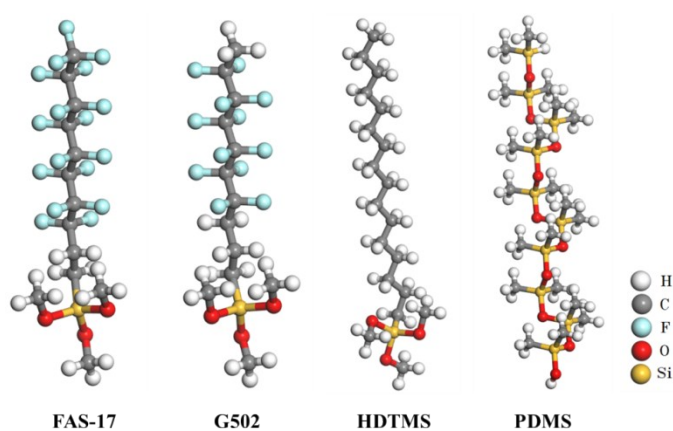

Fig. S4 Geometries of FAS-17, G502, HDTMS and PDMS

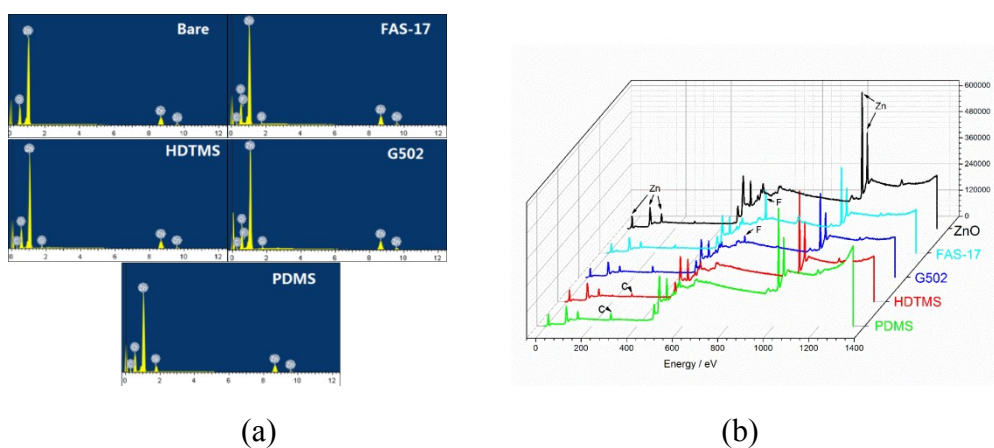

Fig. S5 EDS(a) and XPS(b) spectrum of the ZnO nanostructures before and after surface modification

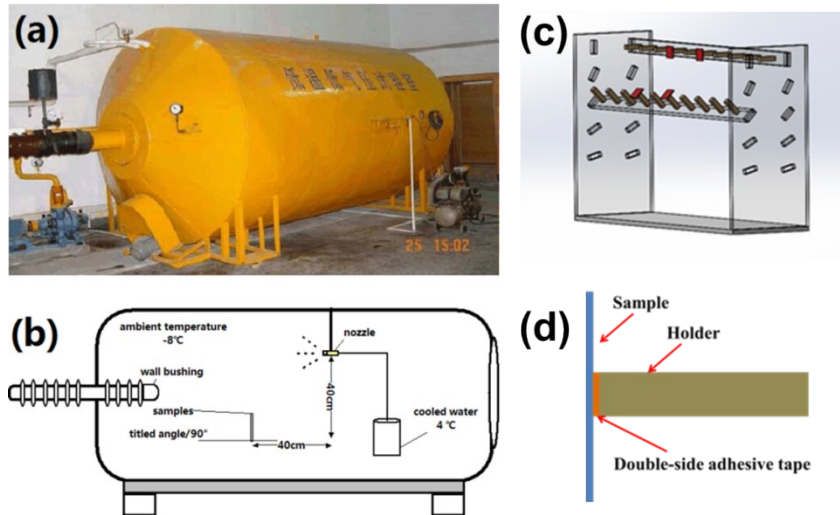

Fig. S6 The detailed description of the artificial climate laboratory: (a) the layout of the artificial climate laboratory. (b) the inner schematic of the artificial climate laboratory to simulate the snowy weather of glaze ice. (c-d) schematic of sample holder

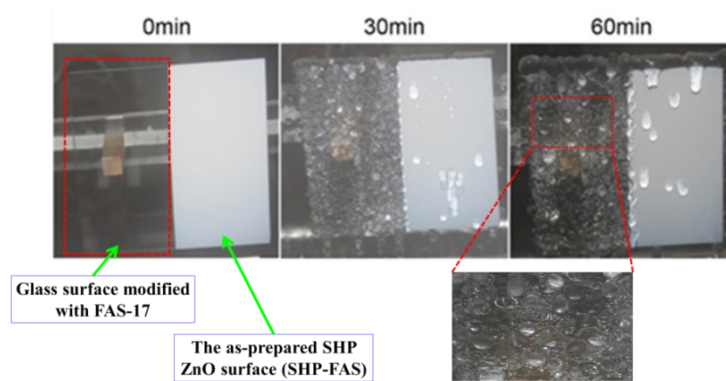

Fig. S7 Freezing process of bare glass modified with FAS-17 and SHP-FAS

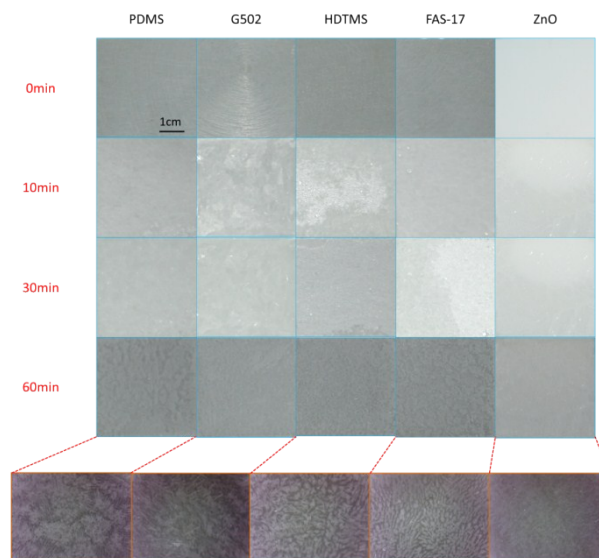

Fig. S8 Frosting process of glass modified with PDMS, G502, HDTMS, FAS-17 and the ZnO surface without modification.

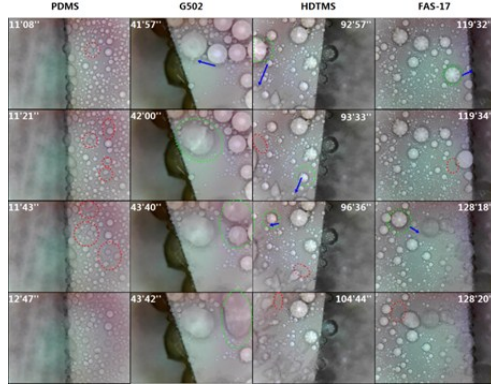

Fig. S9 Frost propagation on as-prepared SHP ZnO surfaces modified with FAS-17, G502, HDTMS and PDMS.

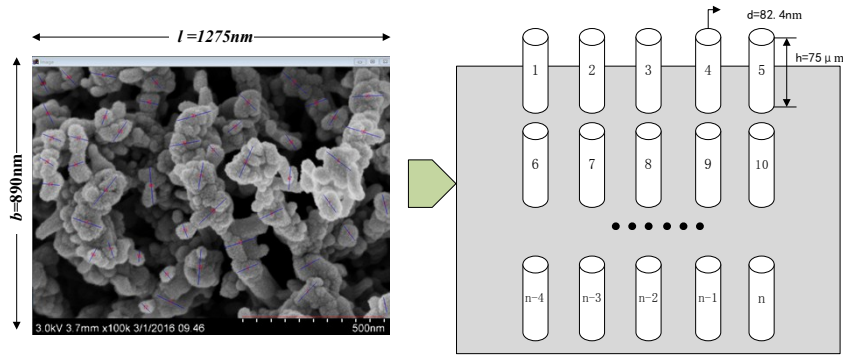

Fig. S10 Conversion diagram of the ZnO nanostructures into cylindrical structures. Given that  $f_s = 0.041$

$h = 7.5\mu\text{m}$  and  $d = 82.4\text{nm}$ , we can calculate  $n \approx 9$ . Therefore, the surface roughness  $r$  can be calculated to

be 16.39 according to  $r = \frac{n\pi dh + lb}{lb}$ .

Table. S1 Surface roughness of the FAS-17, G502, HDTMS and PDMS modified SHP surfaces

|            | SHP-FAS           | SHP-G502         | SHP-HDTMS        | SHP-PDMS         |
|------------|-------------------|------------------|------------------|------------------|
| $R_a$ (nm) | $430.1 \pm 80.4$  | $455.1 \pm 84.4$ | $438.4 \pm 82.7$ | $462.4 \pm 52.4$ |
| $R_q$ (nm) | $546.8 \pm 105.1$ | $554.6 \pm 97.0$ | $560.7 \pm 95.5$ | $610.4 \pm 68.8$ |

Table. S2 CAs and SAs of the FAS-17, G502, HDTMS and PDMS modified SHP surfaces

|              | SHP-FAS         | SHP-G502        | SHP-HDTMS       | SHP-PDMS        |
|--------------|-----------------|-----------------|-----------------|-----------------|
| CA           | $166.7 \pm 2.2$ | $162.1 \pm 2.1$ | $164.1 \pm 1.8$ | $162.8 \pm 3.4$ |
| ( $^\circ$ ) |                 |                 |                 |                 |

---

|       |     |     |     |     |
|-------|-----|-----|-----|-----|
| SA(°) | 1.5 | 2.4 | 1.4 | 6.1 |
|-------|-----|-----|-----|-----|

---

Supplementary Video. S1 recorded the self-transfer phenomenon on the SHP surface modified with FAS-17 condensing at -5°C in 5min. The frame rate was 1000 frame per second. Supplementary Video.

**References:**

- [1] Y.M. Huang, Q.-l. Ma, B.-g. Zhai, A simple method to grow one-dimensional ZnO nanostructures in air, *Materials Letters*, 93 (2013) 266-268.
- [2] G.J. Fang, D. Li, B.-L. Yao, Influence of post-deposition annealing on the properties of transparent conductive nanocrystalline ZAO thin films prepared by RF magnetron sputtering with highly conductive ceramic target, *Thin Solid Films*, 418 (2002) 156-162.
- [3] S. Cho, J. Ma, Y. Kim, Y. Sun, G.K.L. Wong, J.B. Ketterson, Photoluminescence and ultraviolet lasing of polycrystalline ZnO thin films prepared by the oxidation of the metallic Zn, *Applied Physics Letters*, 75 (1999) 2761-2763.
